# Supplementary material for: Effects of the Heterodimeric Neurotoxic Phospholipase A2 from the Venom of Vipera nikolskii on the Contractility of Rat Papillary Muscles and Thoracic Aortas
Source: MDPI journal article supplement (doi:10.3390/toxins16020100), 2024-02-10
Supplement: s1 [file s1]

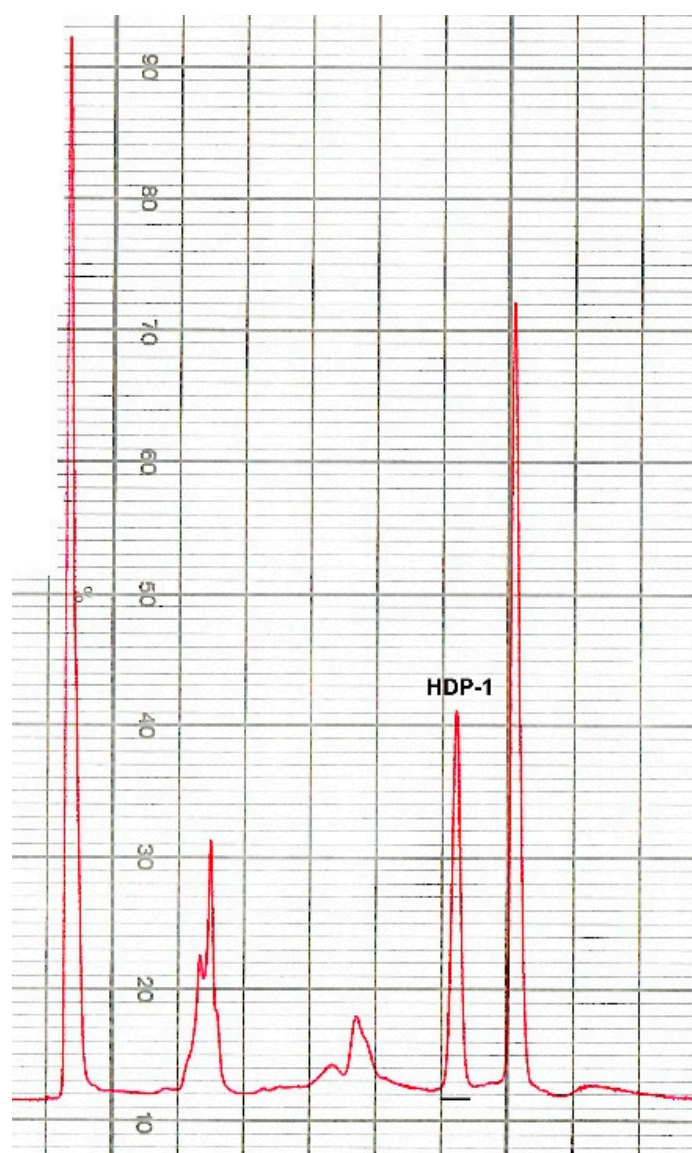

**Figure S1.** Isolation of HDP-1 by cation-exchange chromatography under conditions described in [25]. Horizontal bar indicates the fraction containing HDP-1.

20231118\_034\_RZ\_HDP-1\_protein 11/18/23 14:13:46  
 30 cm 100um Inertsil 1.9 pulled-emitter, cartridgeTrapColumn  
 20231118\_034\_RZ\_HDP-1\_protein #331-338 RT: 20.14-20.54 AV: 8 NL: 1.86E8  
 T: FTMS + p NSI sid=15.00 Full ms [400.0000-2000.0000]

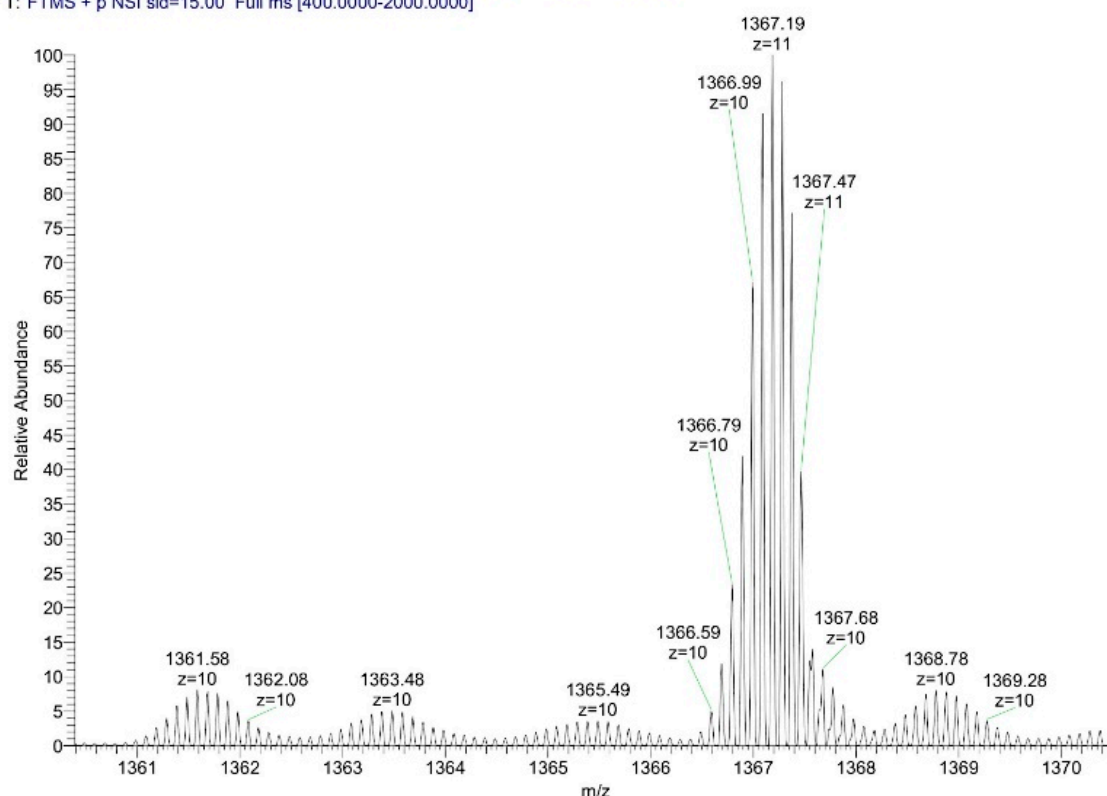

(a)

20231118\_034\_RZ\_HDP-1\_protein #299-305 RT: 18.31-18.65 AV: 7 NL: 8.51E8  
 T: FTMS + p NSI sid=15.00 Full ms [400.0000-2000.0000]

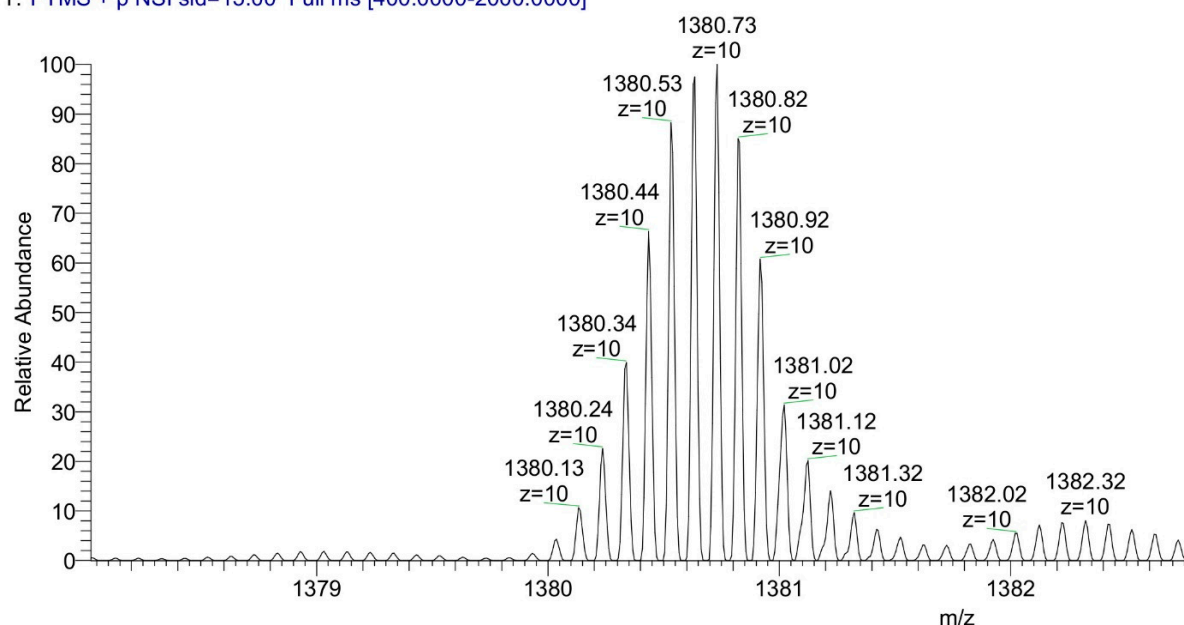

(b)

Figure S2. High-resolution mass-spectra of HDP-1 registered in positive mode. (a) Fragment of the spectrum of the acidic HDP-1 subunit (HDP-1I),  $z = +10$ . It should be noted that the experimental mass is 40 ae higher than the calculated one, which is apparently due to the bound calcium ion. A signal corresponding to a

protein without calcium could not be detected. (b) Fragment of the spectrum of the basic HDP-1 subunit (HDP-1P),  $z = +10$ . Within the experimental error, the determined mass corresponds to the calculated one.

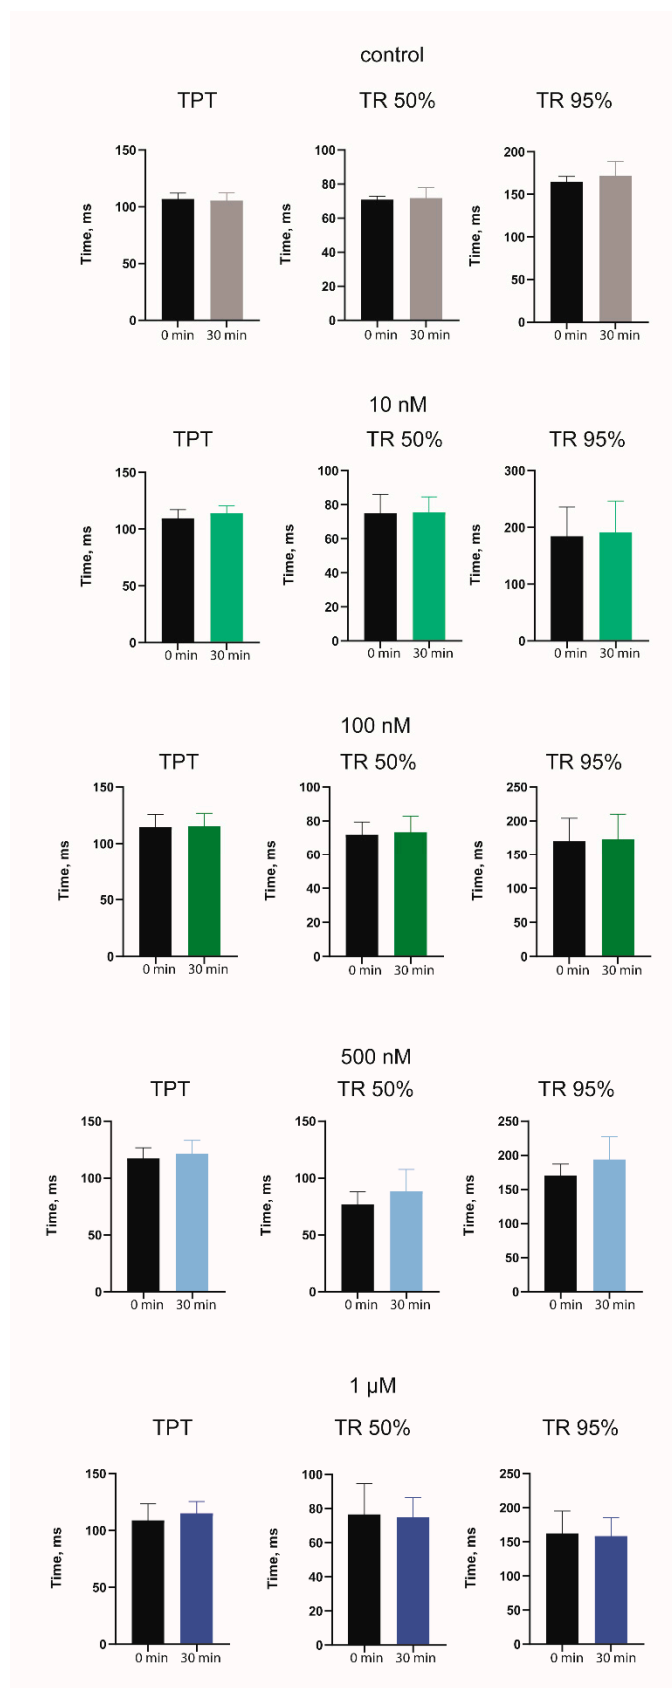

**Figure S3.** Effect of different HDP-1 concentrations on the kinetic parameters of contraction. TPT, time to peak tension, TR 50%, the time from peak tension to 50% relaxation, TR 95%, the time from peak tension to 95% relaxation. No statistically significant differences with control were observed for all experiments.

**Table S1.** Effect of different HDP-1 concentrations on the kinetic parameters of the papillary muscle contraction.

| Parameter                     | Control<br>n=5 |             | HDP-1 concentration |              |              |              |              |              |                  |              |
|-------------------------------|----------------|-------------|---------------------|--------------|--------------|--------------|--------------|--------------|------------------|--------------|
|                               |                |             | 10nM<br>n=5         |              | 100nM<br>n=5 |              | 500nM<br>n=6 |              | 1 $\mu$ M<br>n=6 |              |
|                               | Initial        | 30 min      | Initial             | 30 min       | Initial      | 30 min       | Initial      | 30 min       | Initial          | 30 min       |
| Time to peak tension, ms      | 107 $\pm$ 2    | 105 $\pm$ 3 | 110 $\pm$ 3         | 114 $\pm$ 3  | 115 $\pm$ 5  | 116 $\pm$ 5  | 119 $\pm$ 6  | 123 $\pm$ 5  | 109 $\pm$ 6      | 115 $\pm$ 4  |
| Time of relaxation to 50%, ms | 71 $\pm$ 1     | 72 $\pm$ 3  | 75 $\pm$ 5          | 76 $\pm$ 4   | 72 $\pm$ 3   | 74 $\pm$ 4   | 78 $\pm$ 4   | 89 $\pm$ 9   | 77 $\pm$ 7       | 75 $\pm$ 5   |
| Time of relaxation to 95%, ms | 165 $\pm$ 3    | 172 $\pm$ 8 | 185 $\pm$ 23        | 191 $\pm$ 25 | 170 $\pm$ 15 | 173 $\pm$ 16 | 167 $\pm$ 7  | 186 $\pm$ 11 | 162 $\pm$ 13     | 158 $\pm$ 11 |
